# Supplementary material
Source: publisher figshare collection journal article supplement (https://sage.figshare.com/ndownloader/files/24127808)
Supplement: Supplementary file 1 [file 24127808]

## Supplemental Material

### Validation of a High-Throughput Calcium Mobilization Assay for the Human Trace Amine-Associated Receptor 1

By Ann M. Decker\*, Kelly M. Mathews, Bruce E. Blough, and Brian P. Gilmour.

Center for Drug Discovery, RTI International, Research Triangle Park, North Carolina, 27709, USA

Correspondence: Dr. Ann M. Decker, Center for Drug Discovery, RTI International, Post Office Box 12194, Research Triangle Park, NC 27709, USA. Tel: 919-541-1246, E-mail: adecker@rti.org.

| Parameter | Addition-2  | Addition-3  |
|-----------|-------------|-------------|
| Z'-factor | 0.84 ± 0.09 | 0.79 ± 0.07 |
| S/N       | 87 ± 15     | 253 ± 85    |
| %CV       | 4 ± 3       | 6 ± 2       |

**Table S1.** Assay performance data for 384-well hTAAR1 calcium mobilization assay. Parameters were calculated as described in the Materials and Methods section. Each value is the mean ± S.D. from five independent experiments.

|       | PEA EC <sub>50</sub><br>(nM) ± S.D.,<br>Addition-2 | PEA EC <sub>50</sub><br>(nM) ± S.D.,<br>Addition-3 |
|-------|----------------------------------------------------|----------------------------------------------------|
| Day 1 | 154 ± 36                                           | 123 ± 14                                           |
| Day 2 | 145 ± 7                                            | 100 ± 20                                           |
| Day 3 | 179 ± 15                                           | 140 ± 15                                           |
| Day 4 | 104 ± 14                                           | 126 ± 24                                           |
| Day 5 | 122 ± 11                                           | 118 ± 10                                           |

**Table S2.** Intra-day and inter-day data for 384-well hTAAR1 calcium mobilization assay. The PEA potency was monitored on six plates over five days. Each value is the mean ± S.D. from six separate plates. Results cluster well around the 151 nM EC<sub>50</sub> value determined from the 384-well miniaturization assays.

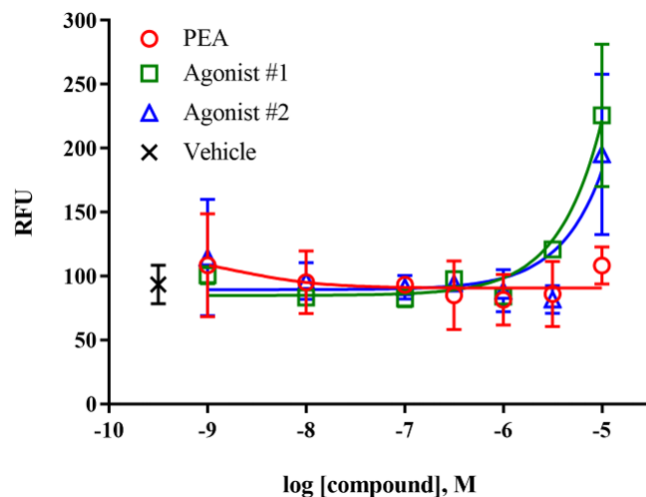

**Figure S1.** Response of two confirmed agonists in CHO-Gα<sub>q16</sub> cells. Concentration response curves of two agonists and the control PEA in parental CHO-Gα<sub>q16</sub> cells, as described in the Materials and Methods section. Data points are the mean ± S.D. of two independent experiments conducted in duplicate. PEA does not elicit a response while the two agonists elicit a minimal response (~200 RFUs).

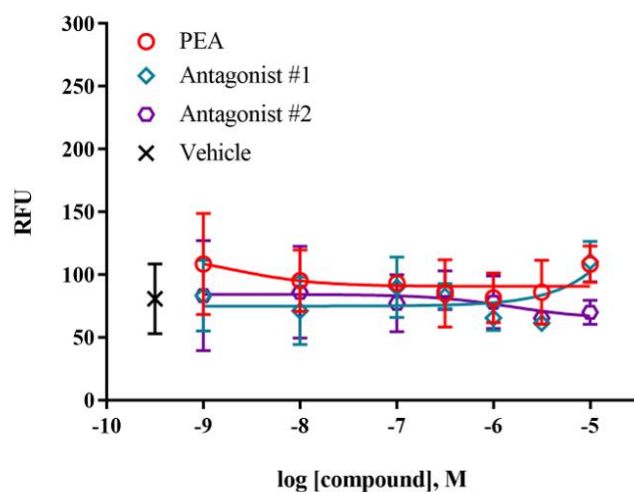

**Figure S2.** Response of two confirmed antagonist equivalents in CHO-Gα<sub>q16</sub> cells. Concentration response curves of two agonists and the control PEA in parental CHO-Gα<sub>q16</sub> cells, as described in the Materials and Methods section. Data points are the mean ± S.D. of two independent experiments conducted in duplicate. No response is elicited by either antagonist.

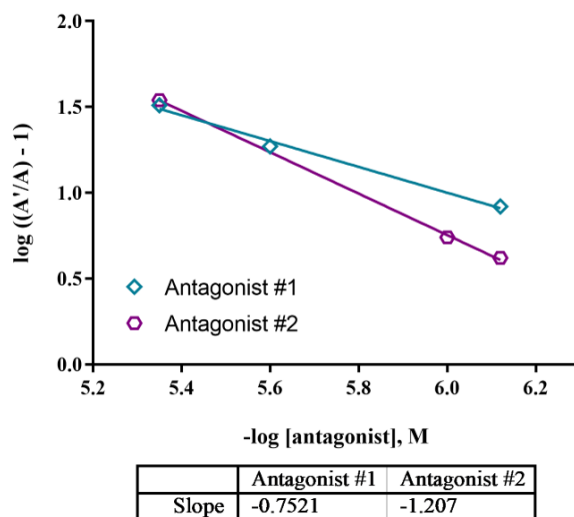

**Figure S3.** Schild plot for two confirmed antagonist equivalents in CHO-G $\alpha_{q16}$ -hTAAR1 cells. Curve shift assays were performed as described in the Materials and Methods section. Representative data are shown and each data point represents a separate curve shift assay performed in duplicate.

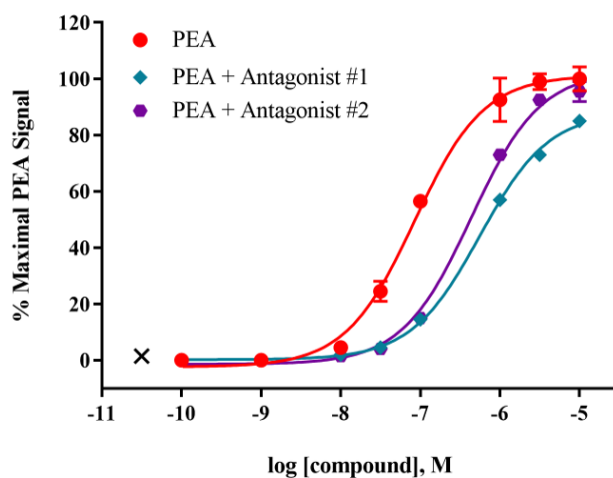

**Figure S4.** Curve shift assay to determine  $K_e$  values for two confirmed antagonist equivalents in CHO-G $\alpha_{q16}$ -hTAAR1 cells, as described in the Materials and Methods section. Representative data are shown and each data point is the mean  $\pm$  S.D. of duplicate determinations.
